# Supplementary material
Source: PubMed Central journal article supplement (PMC7745432)
Supplement: ao0c04822_si_001.pdf [file ao0c04822_si_001.pdf]

## Supporting Information for

### Encapsulation of Highly Volatile Fragrances in Y Zeolites for Sustained Release:

#### Experimental and Theoretical Studies

Zixie Li<sup>†</sup>, Jianxiang Huang<sup>‡</sup>, Long Ye<sup>†</sup>, Yichao Lv<sup>†</sup>, Zhuxian Zhou,<sup>‡</sup> Youqing Shen,<sup>‡</sup>

Yi He,<sup>‡</sup> and Liming Jiang<sup>\*,†</sup>

<sup>†</sup> Key Laboratory of Macromolecular Synthesis and Functionalization, Ministry of Education; Department of Polymer Science and Engineering, Zhejiang University, Hangzhou 310027, China

Hangzhou 310027, China

<sup>‡</sup> Key Laboratory of Biomass Chemical Engineering, Ministry of Education; Center for Bionanoengineering, College of Chemical and Biological Engineering, Zhejiang University, Hangzhou 310027, China

University, Hangzhou 310027, China

\*Corresponding author Email: [cejlm@zju.edu.cn](mailto:cejlm@zju.edu.cn)

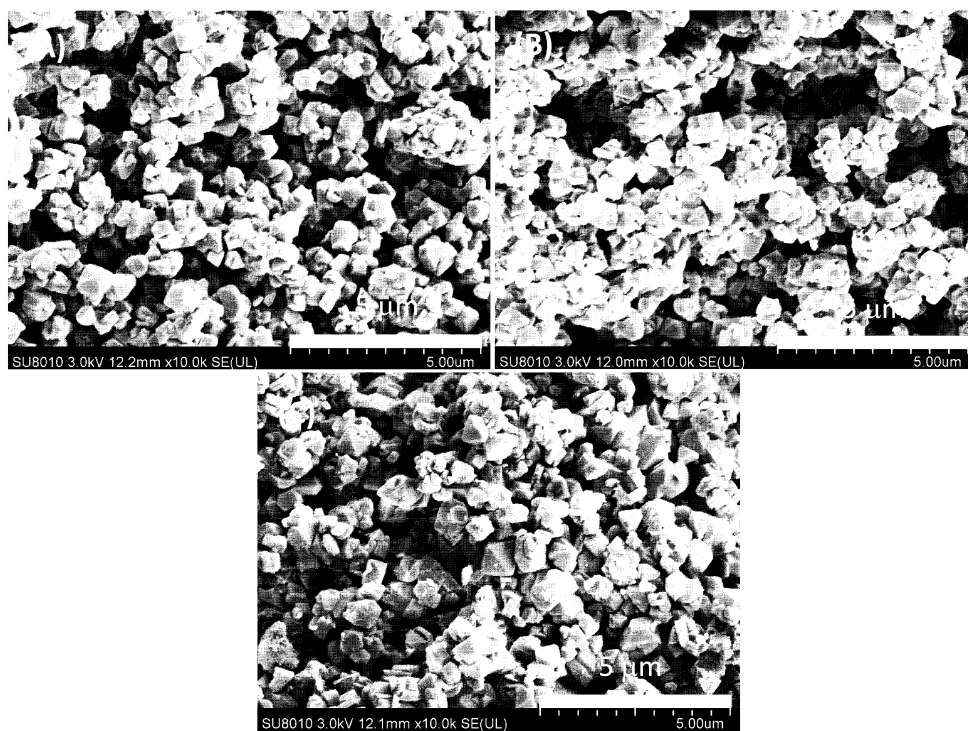

**Figure S1.** SEM images of Y-type zeolites with different extra-framework metal ions: (A) NaY, (B) Ca<sub>0.91</sub>Y, and (C) La<sub>0.90</sub>Y. The latter two were obtained from the parent zeolite NaY by an ion-exchanging process.

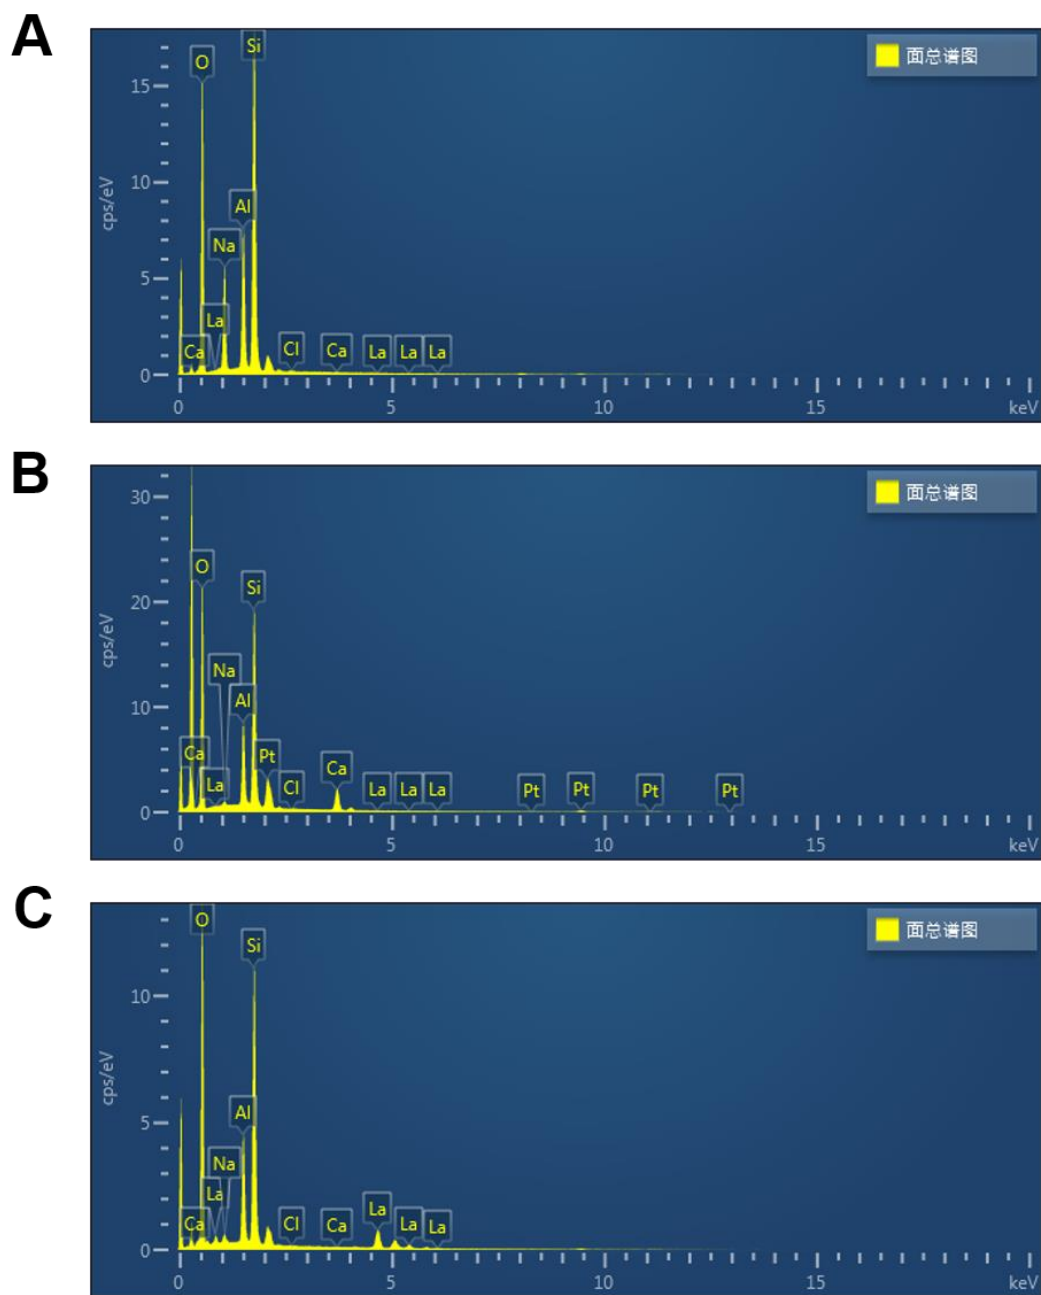

**Figure S2.** Total energy dispersion spectra on the surface of Y zeolites with different extra-framework cations: (A) NaY; (B) Ca<sub>0.91</sub>Y; (C) La<sub>0.90</sub>Y.

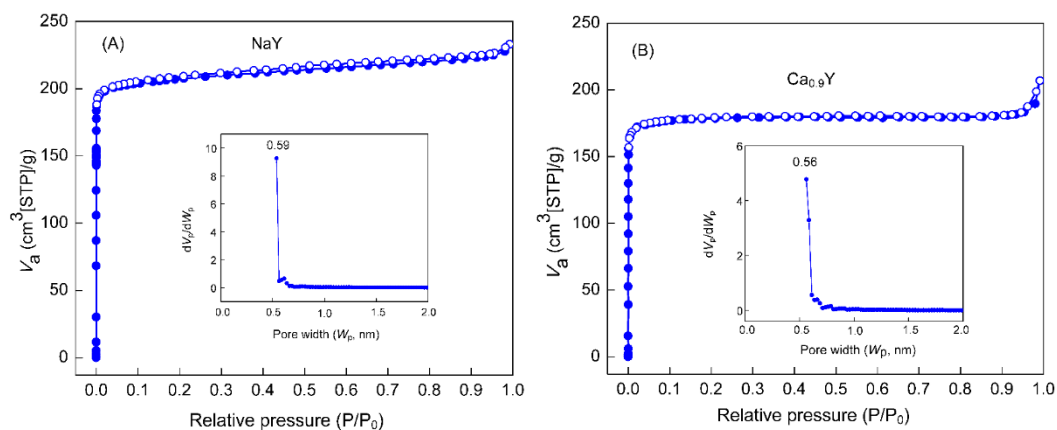

**Figure S3.** N<sub>2</sub> adsorption–desorption isotherms measured at 77 K for Ca<sub>0.91</sub>Y (A) and La<sub>0.90</sub>Y (B). Insets: the corresponding pore width distribution curve derived from desorption isotherm branches by the BJH method.

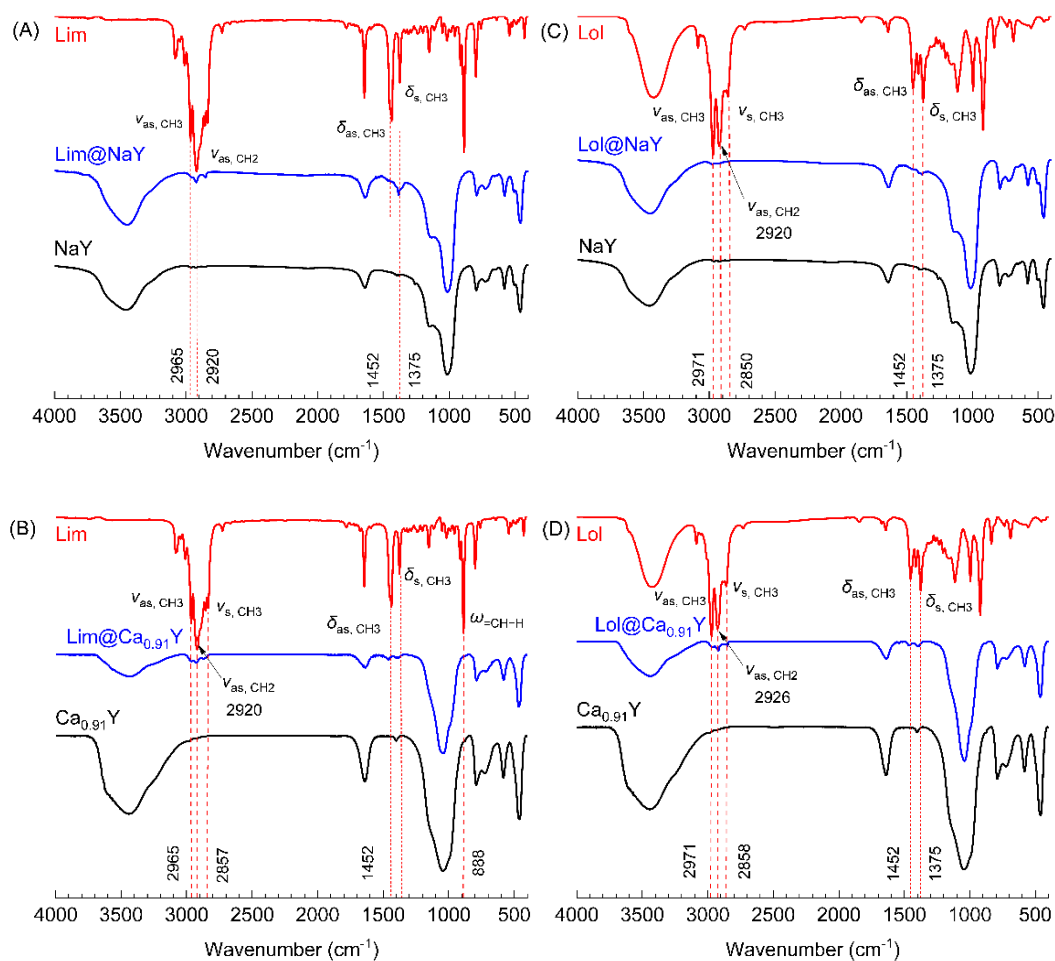

**Figure S4.** Comparison of IR spectra of neat fragrances limonene (A, B) and linalool (C, D) with that of Y zeolites and composites FG@ZY thereof.

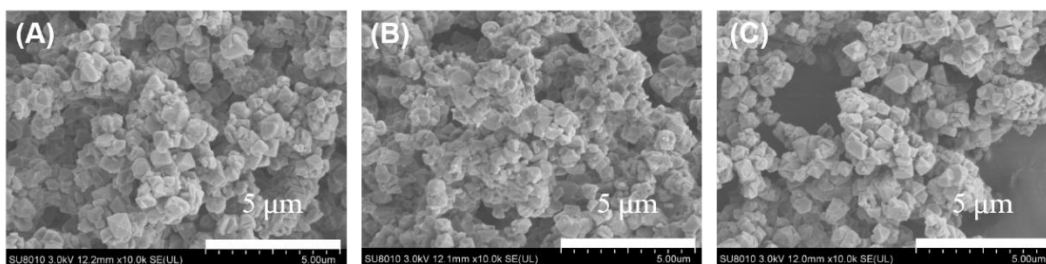

**Figure S5.** SEM images of linalool-loaded composites: (A) Lol@NaY, (B) Lol@Ca<sub>0.91</sub>Y, and (C) Lol@La<sub>0.90</sub>Y.

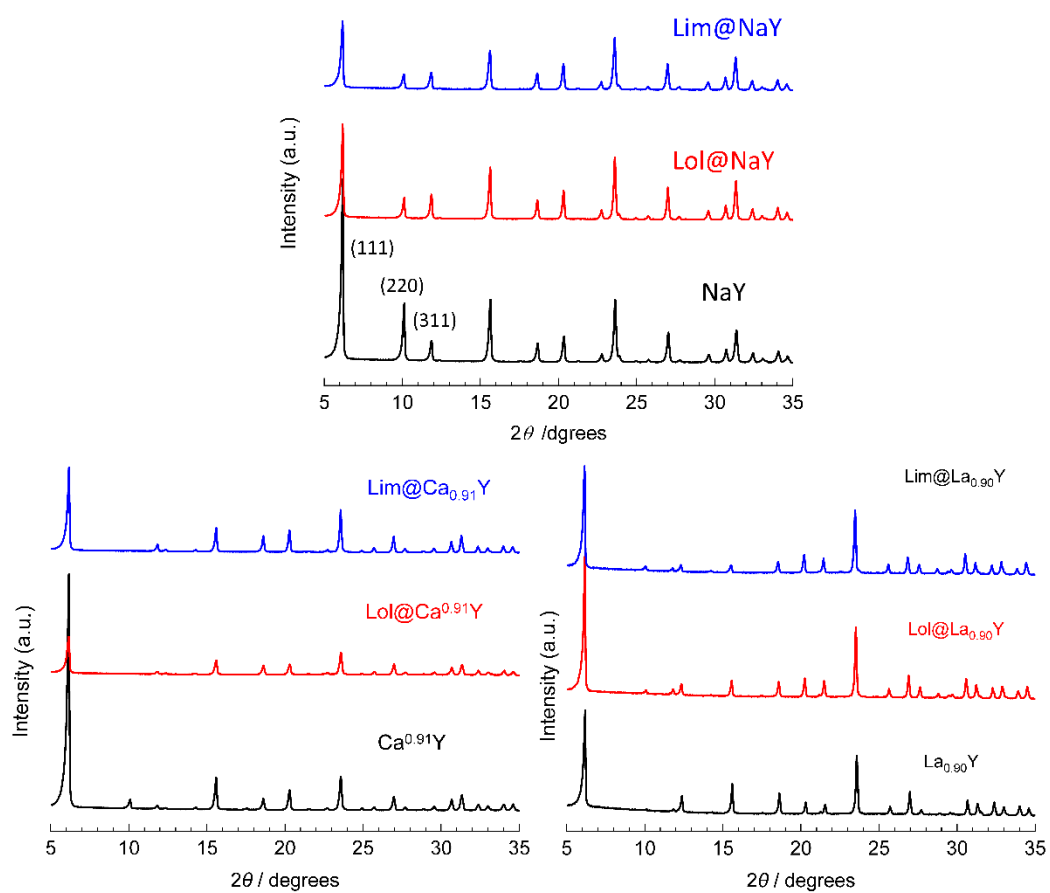

**Figure S6.** Comparison of powder X-ray diffraction (PXRD) patterns of Y zeolites with the corresponding fragrance-loaded composites.

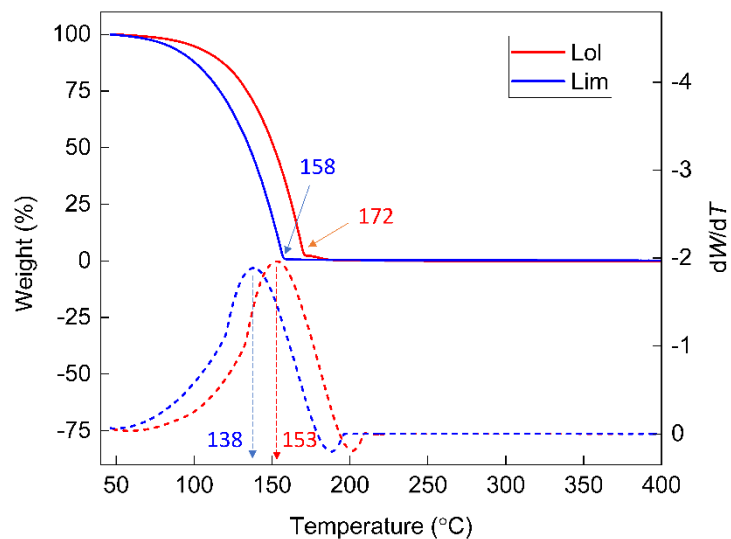

**Figure S7.** TGA curves of free fragrances D-limonene and linalool.

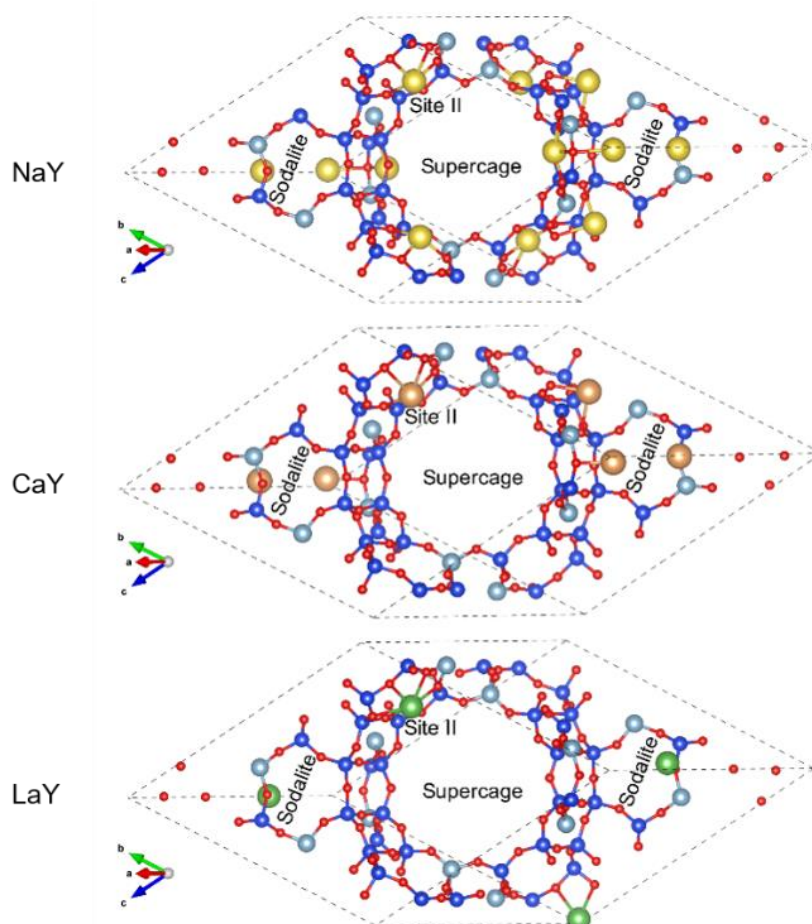

**Figure S8.** Periodic model of a primitive cell of the zeolite NaY, CaY, and LaY (Si: blue; Al: grey; O: red; Na: yellow; Ca: brown; La: green).

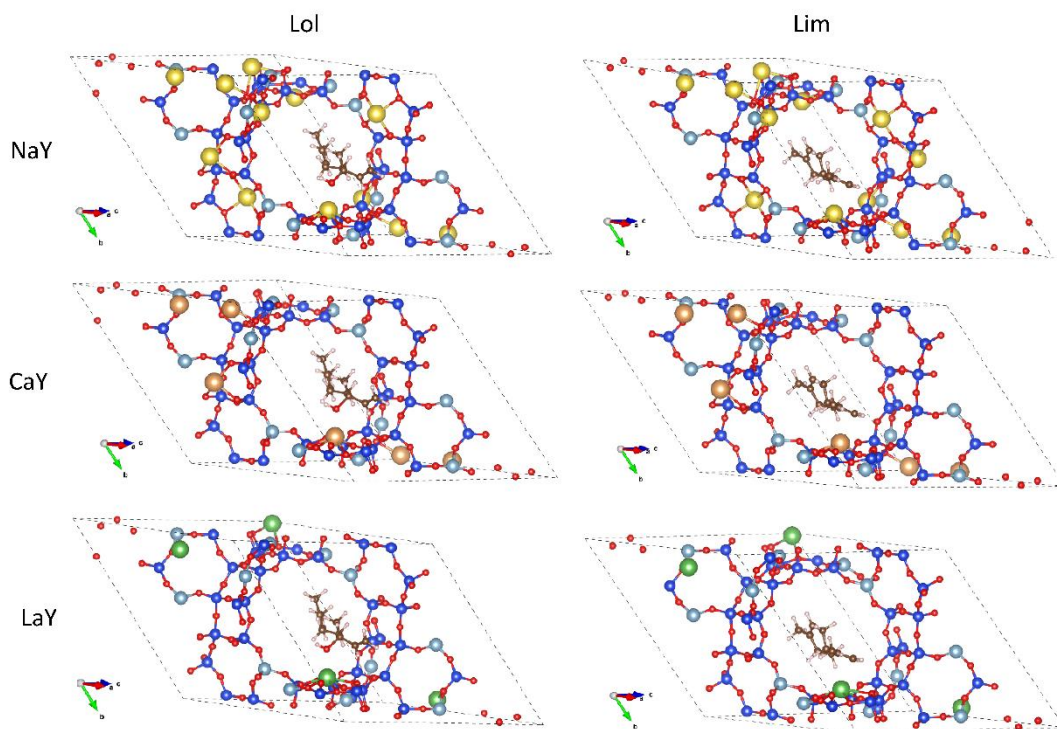

**Figure S9.** The most stable adsorption configurations of fragrance molecules onto Y zeolites NaY, CaY, and LaY at a primitive cell scale.

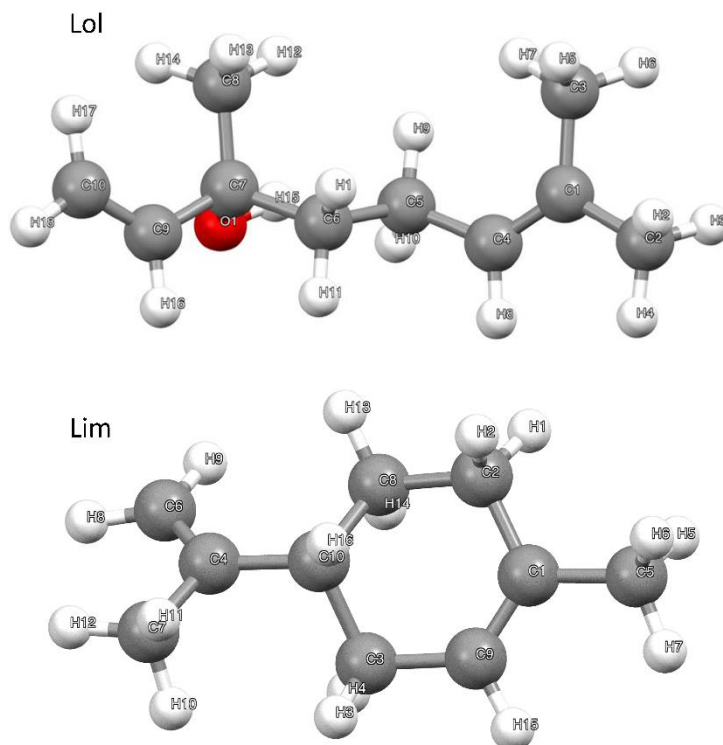

**Figure S10.** The chemical structures of linalool (Lol) and limonene (Lim) with labels on the atoms.

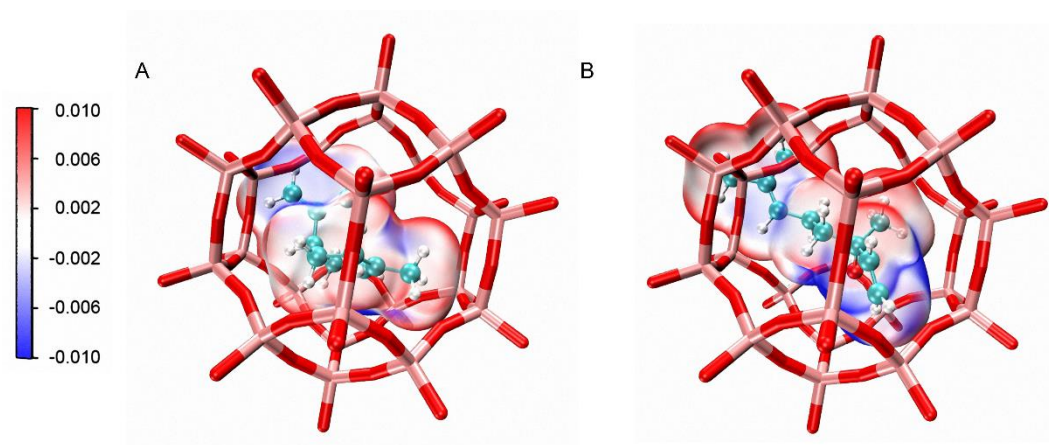

**Figure S11.** Graphical representation of the shape-selectivity of the sodalite cage in Y zeolites towards D-limonene (A) and linalool (B).



**Table S1.** Preparation of La<sub>x</sub>Y starting from La<sub>0.62</sub>Y <sup>a</sup>

| Calcination-impregnation cycles | 0    | 1    | 2    | 3    |
|---------------------------------|------|------|------|------|
| Ion exchange degree, <i>x</i>   | 0.62 | 0.90 | 0.95 | 0.97 |

<sup>a</sup> Calcination for 6 h at 400 °C followed by soaking with 1.0 M LaCl<sub>3</sub> solution for 24 h at r.t. is considered a cycle.

**Table S2.** Chemical composition of Y-type zeolites determined by energy dispersive spectroscopy

| Element | Element content (wt-%) |                      |                      |
|---------|------------------------|----------------------|----------------------|
|         | NaY                    | Ca <sub>0.91</sub> Y | La <sub>0.90</sub> Y |
| O       | 64.70                  | 76.08                | 73.11                |
| Na      | 8.51                   | 0.48                 | 0.73                 |
| Al      | 7.64                   | 6.14                 | 6.83                 |
| Si      | 19.15                  | 14.71                | 17.12                |
| Cl      | 0.00                   | 0.00                 | 0.00                 |
| Ca      | 0.00                   | 2.59                 | 0.00                 |
| La      | 0.00                   | 0.00                 | 2.21                 |
| Total   | 100.00                 | 100.00               | 100.00               |

**Table S3.** Fragrance release kinetic parameters for FG@NaY composites

| Sample  | First-order Eq.             |                       | Higuchi Eq.                   |                       | Weibull Eq.                 |          |                       |
|---------|-----------------------------|-----------------------|-------------------------------|-----------------------|-----------------------------|----------|-----------------------|
|         | <i>k</i> (s <sup>-1</sup> ) | <i>R</i> <sup>2</sup> | <i>k</i> (s <sup>-0.5</sup> ) | <i>R</i> <sup>2</sup> | <i>k</i> (s <sup>-1</sup> ) | <i>n</i> | <i>R</i> <sup>2</sup> |
| Lol@NaY | 1.9×10 <sup>-7</sup>        | 0.9249                | 4.4×10 <sup>-3</sup>          | 0.9815                | 1.7×10 <sup>-7</sup>        | 0.40     | 0.9845                |
| Lim@NaY | 1.1×10 <sup>-7</sup>        | 0.9878                | 3.6×10 <sup>-3</sup>          | 0.9997                | 6.1×10 <sup>-8</sup>        | 0.38     | 0.9993                |

**Table S4.** Zero-order kinetic parameters for the release of fragrance from FG@Ca<sub>0.91</sub>Y and FG@La<sub>0.90</sub>Y

| Sample                      | Lol@Ca <sub>0.91</sub> Y | Lim@Ca <sub>0.91</sub> Y | Lol@La <sub>0.90</sub> Y | Lim@La <sub>0.90</sub> Y |
|-----------------------------|--------------------------|--------------------------|--------------------------|--------------------------|
| <i>k</i> (s <sup>-1</sup> ) | 1.0×10 <sup>-7</sup>     | 4.7×10 <sup>-8</sup>     | 8.6×10 <sup>-8</sup>     | 3.7×10 <sup>-8</sup>     |
| <i>R</i> <sup>2</sup>       | 0.9996                   | 0.9914                   | 0.9930                   | 0.9947                   |

**Table S5.** The Bader charge differences of linalool in Y-type zeolites (see Figure S10)

| $\Delta Q$ | Lol     |         |         |
|------------|---------|---------|---------|
|            | NaY     | CaY     | LaY     |
| O1         | 0.4820  | 0.4870  | 0.4660  |
| C1         | -0.0198 | 0.0226  | 0.0116  |
| C2         | 0.0074  | -0.0095 | -0.0025 |
| C3         | -0.0625 | -0.0041 | 0.0114  |
| C4         | -0.0078 | -0.0078 | -0.0081 |
| C5         | -0.0520 | -0.0115 | -0.0032 |
| C6         | -0.0035 | -0.0080 | 0.0041  |
| C7         | -0.0064 | -0.0396 | -0.0585 |
| C8         | 0.0017  | -0.0033 | -0.0206 |
| C9         | -0.0174 | -0.0211 | -0.0702 |
| C10        | 0.0112  | 0.0184  | 0.0402  |
| H1         | -0.0009 | 0.0274  | 0.0544  |
| H2         | 0.0249  | 0.0294  | 0.0128  |
| H3         | -0.0166 | 0.0055  | 0.0054  |
| H4         | -0.0131 | -0.0043 | 0.0051  |
| H5         | 0.1150  | 0.0158  | 0.0169  |
| H6         | 0.0070  | 0.0268  | 0.0294  |
| H7         | -0.0192 | -0.0183 | -0.0132 |
| H8         | 0.0070  | 0.0130  | 0.0130  |
| H9         | 0.0543  | 0.0089  | 0.0108  |
| H10        | 0.0064  | -0.0122 | -0.0266 |
| H11        | 0.0036  | 0.0089  | 0.0167  |
| H12        | 0.0079  | 0.0172  | 0.0369  |
| H13        | 0.0034  | 0.0275  | 0.0471  |
| H14        | 0.0089  | 0.0063  | 0.0095  |
| H15        | 0.0239  | 0.0465  | 0.0589  |
| H16        | 0.0053  | 0.0062  | 0.0121  |
| H17        | 0.0066  | 0.0197  | 0.0314  |
| H18        | 0.0098  | 0.0311  | 0.0447  |
| Total      | 0.5670  | 0.6780  | 0.7350  |

**Table S6.** The Bader charge differences of limonene in Y-type zeolites (see Figure S10).

| $\Delta Q$ | Lim     |         |         |
|------------|---------|---------|---------|
|            | NaY     | CaY     | LaY     |
| C1         | 0.0118  | 0.0100  | 0.0197  |
| C2         | -0.0026 | -0.0055 | -0.1120 |
| C3         | 0.0011  | 0.0129  | -0.0452 |
| C4         | -0.0188 | -0.0569 | -0.0636 |
| C5         | 0.0007  | 0.0134  | 0.0206  |
| C6         | -0.0909 | -0.0971 | -0.1820 |
| C7         | -0.0342 | -0.0393 | -0.0998 |
| C8         | -0.0143 | -0.0107 | 0.0060  |
| C9         | 0.0021  | 0.0182  | 0.0310  |
| C10        | -0.0101 | -0.0220 | -0.0166 |
| H1         | -0.0063 | 0.0166  | 0.0149  |
| H2         | 0.0393  | 0.0298  | 0.1300  |
| H3         | -0.0046 | 0.0033  | 0.0112  |
| H4         | -0.0062 | 0.0016  | 0.0032  |
| H5         | -0.0068 | 0.0034  | -0.0121 |
| H6         | -0.0035 | -0.0022 | 0.0175  |
| H7         | 0.0092  | 0.0216  | 0.0230  |
| H8         | 0.0017  | 0.0118  | 0.0256  |
| H9         | 0.0659  | 0.0439  | 0.1400  |
| H10        | 0.0391  | 0.0597  | 0.1280  |
| H11        | 0.0226  | 0.0226  | 0.0215  |
| H12        | -0.0066 | -0.0079 | -0.0033 |
| H13        | 0.0142  | 0.0060  | 0.0010  |
| H14        | 0.0053  | 0.0083  | 0.0209  |
| H15        | -0.0063 | 0.0187  | 0.0336  |
| H16        | 0.0250  | 0.0220  | 0.0459  |
| Total      | 0.0268  | 0.0824  | 0.1590  |
